# Supplementary material for: Interface and interaction of graphene layers on SiC(0001) covered with TiC(111) intercalation
Source: Royal Society of Chemistry journal article supplement (doi:10.1039/c7cp04443g), 2017-01-01
Supplement: c7cp04443g1.pdf [file c7cp04443g1.pdf]

## Supplementary Material

### **Interface and interaction of graphene layers on SiC(000 $\bar{1}$ ) covered with TiC(111) intercalation**

Lu Wang,<sup>a</sup> Qiang Wang,<sup>\*a</sup> Jianmei Huang,<sup>a</sup> Wei-qi Li,<sup>b</sup> Guang-hui Chen,<sup>c</sup> and Yanhui

Yang<sup>\*a</sup>

<sup>a</sup> School of Chemistry and Molecular Engineering, Institute of Advanced Synthesis (IAS), Nanjing Tech University, Nanjing 211816, P. R. China

<sup>b</sup> Department of Physics, Harbin Institute of Technology, Harbin 150001, P. R. China

<sup>c</sup> Department of Chemistry, Shantou University, Guangdong, Shantou, 515063, P. R. China

To whom correspondence should be addressed:

Email: [wangqiang@njtech.edu.cn](mailto:wangqiang@njtech.edu.cn)

Email: [yhyang@njtech.edu.cn](mailto:yhyang@njtech.edu.cn)

Table S1. Total energy (eV) of 1L-TiC/SiC, 2L-TiC/SiC, and 3L-TiC/SiC with the (a, b, c) C/C-, (d, e) C/Ti/C-, and (f) C/Ti-terminated interfaces.

| System     | a       | b       | c       | d       | e       | f       |
|------------|---------|---------|---------|---------|---------|---------|
| 1L-TiC/SiC | -274.34 | -273.87 | -273.53 | -273.21 | -273.10 | -272.51 |
| 2L-TiC/SiC | -284.32 | -284.09 | -282.13 | -       | -       | -       |
| 3L-TiC/SiC | -295.99 | -295.83 | -       | -       | -       | -       |

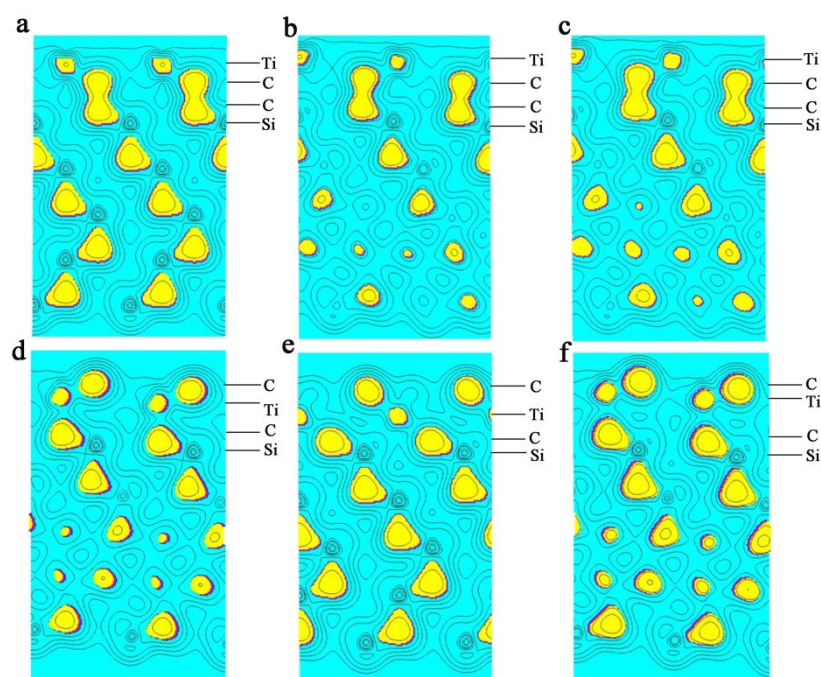

**Fig. S1** Valence electron density for 1L-TiC/SiC: with (a, b, c) C/C-, (d, e) C/Ti/C-, and (f) C/Ti-terminated interfacial configurations.

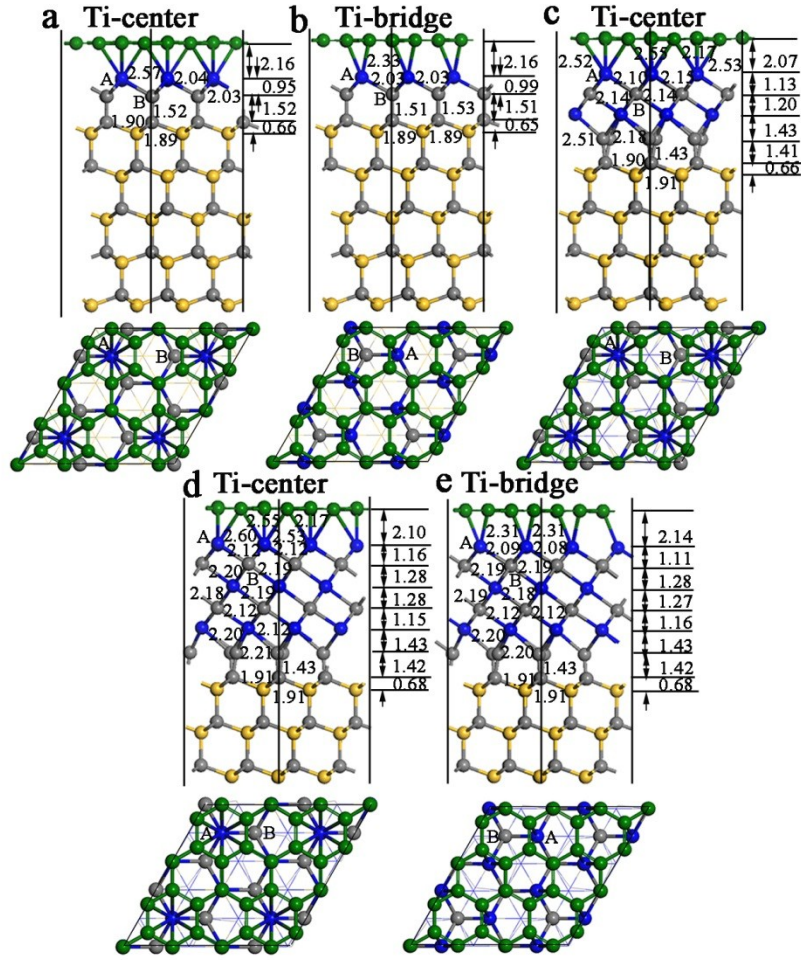

**Fig. S2** Optimal structures of monolayer graphene adsorbed on (a, b) 1L-TiC/SiC, (c) 2L-TiC/SiC, and (d, e) 3L-TiC/SiC substrates. There are two stable configurations of graphene on  $\text{TiC}(111)/\text{SiC}(000\bar{1})$  surfaces: (i) Ti-center-site (A site) and (ii) Ti-bridge-site staking (B site). Green, blue, gray, and yellow spheres represent graphene C atoms, Ti, C, and Si atoms in the  $\text{TiC}(111)/\text{SiC}(000\bar{1})$  substrate, respectively. The unit cell is highlighted by grey solid lines.

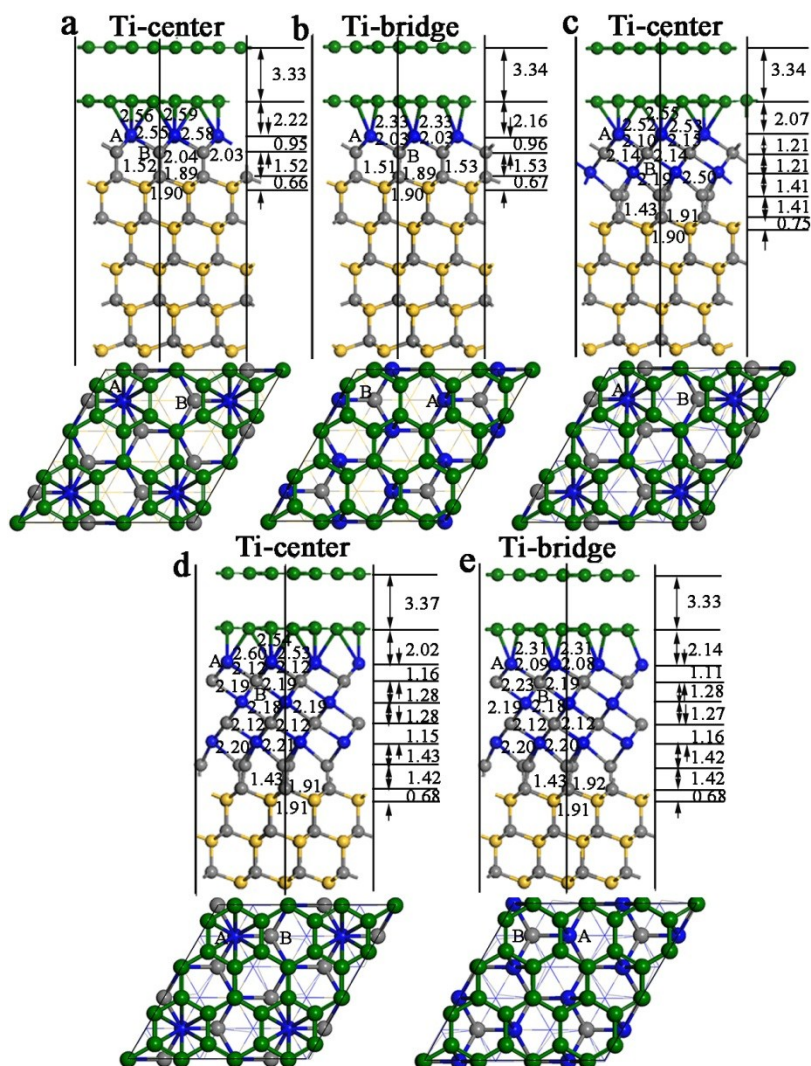

**Fig. S3** Optimal structures of bilayer graphene adsorbed on (a, b) 1L-TiC/SiC, (c) 2L-TiC/SiC, and (d, e) 3L-TiC/SiC substrates. Green, blue, gray, and yellow spheres represent graphene C atoms, Ti, C, and Si atoms in the TiC(111)/SiC(000 $\bar{1}$ ) substrate, respectively. The unit cell is highlighted by grey solid lines.

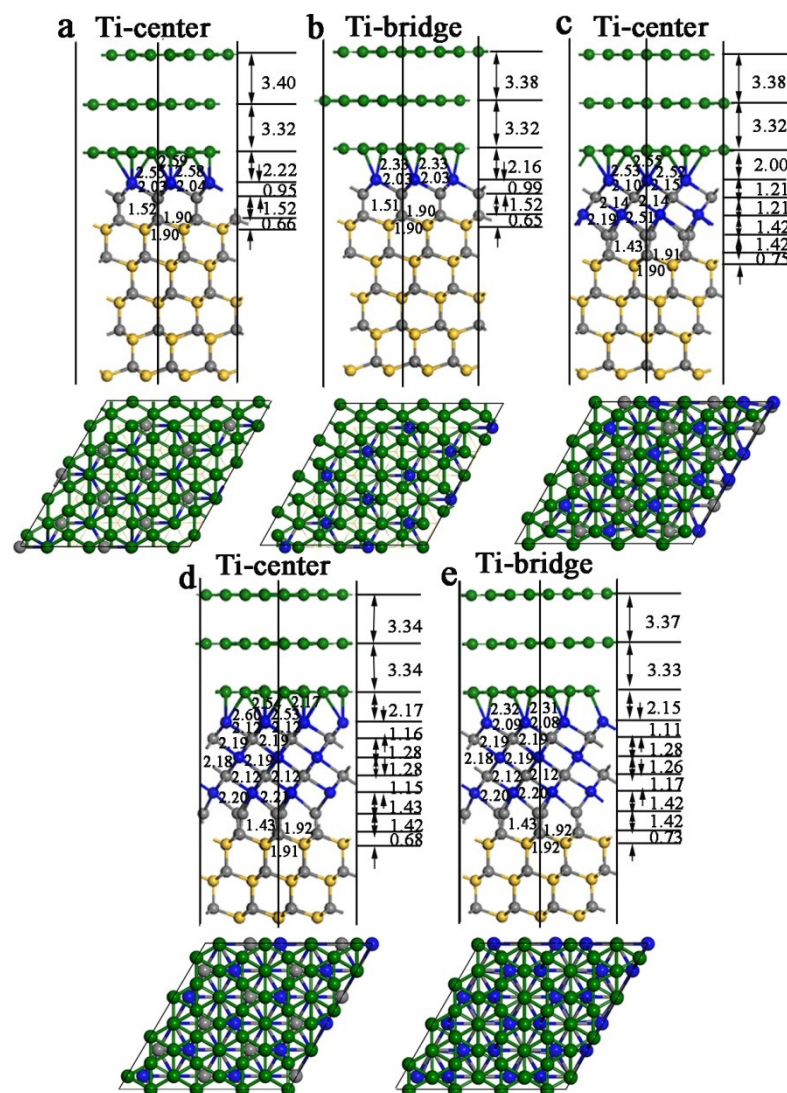

**Fig. S4** Optimal structures of trilayer graphene adsorbed on (a, b) 1L-TiC/SiC, (c) 2L-TiC/SiC, and (d, e) 3L-TiC/SiC substrates. Green, blue, gray, and yellow spheres represent graphene C atoms, Ti, C, and Si atoms in the TiC(111)/SiC(000 $\bar{1}$ ) substrate, respectively. The unit cell is highlighted by grey solid lines.

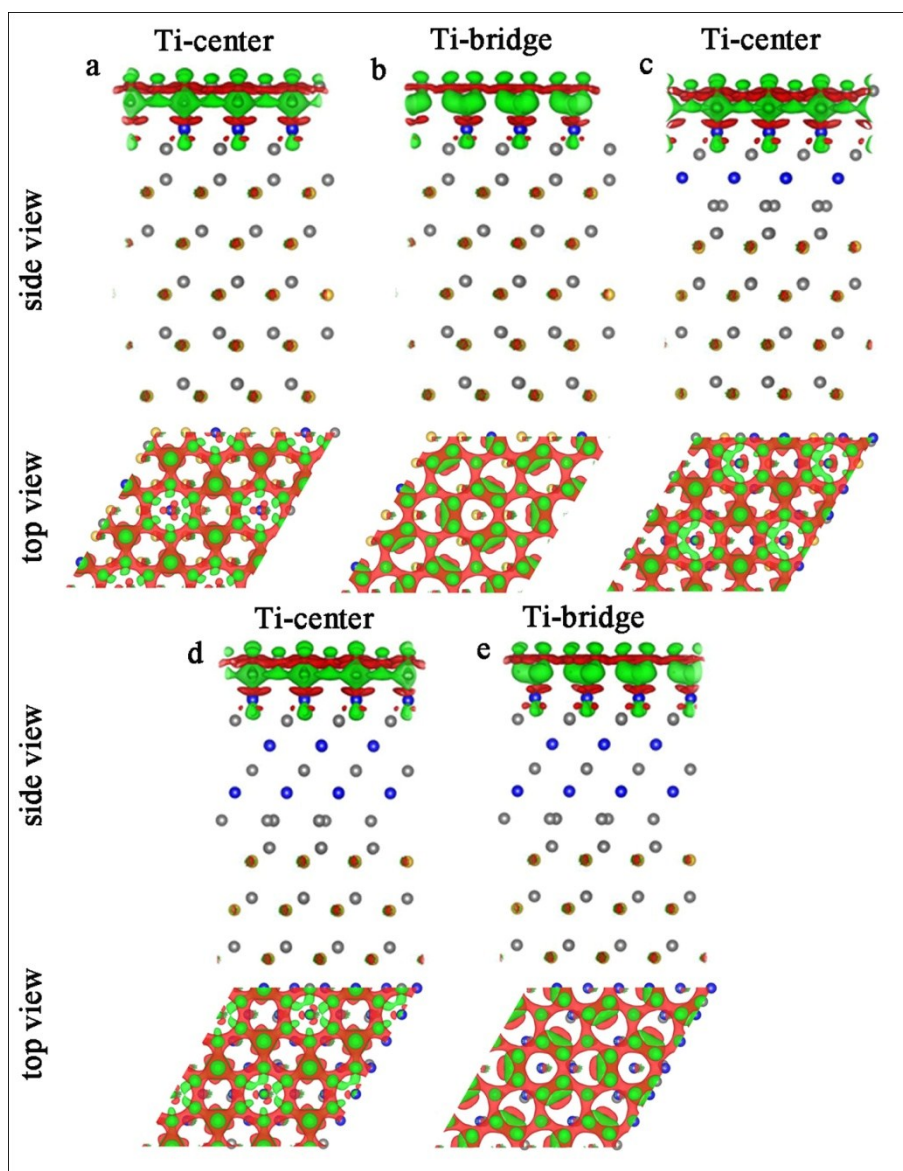

**Fig. S5** Charge density difference plots of monolayer graphene on (a, b) 1L-TiC/SiC, (c) 2L-TiC/SiC, and (d, e) 3L-TiC/SiC substrates. The charge density difference refers to the variance between the total charge density of graphene/TiC(111)/SiC(000 $\bar{1}$ ) systems and the sum of the charge density of the separated graphene and TiC(111)/SiC(000 $\bar{1}$ ). The geometric structures of separated graphene and TiC(111)/SiC(000 $\bar{1}$ ) were kept the same as those in graphene–TiC(111)/SiC(000 $\bar{1}$ ) systems. The red and green color regions mark the depletion and accumulation of electronic charges, respectively. The top views show the charge density difference at interface of the graphene/TiC(111)/SiC(000 $\bar{1}$ ) systems.

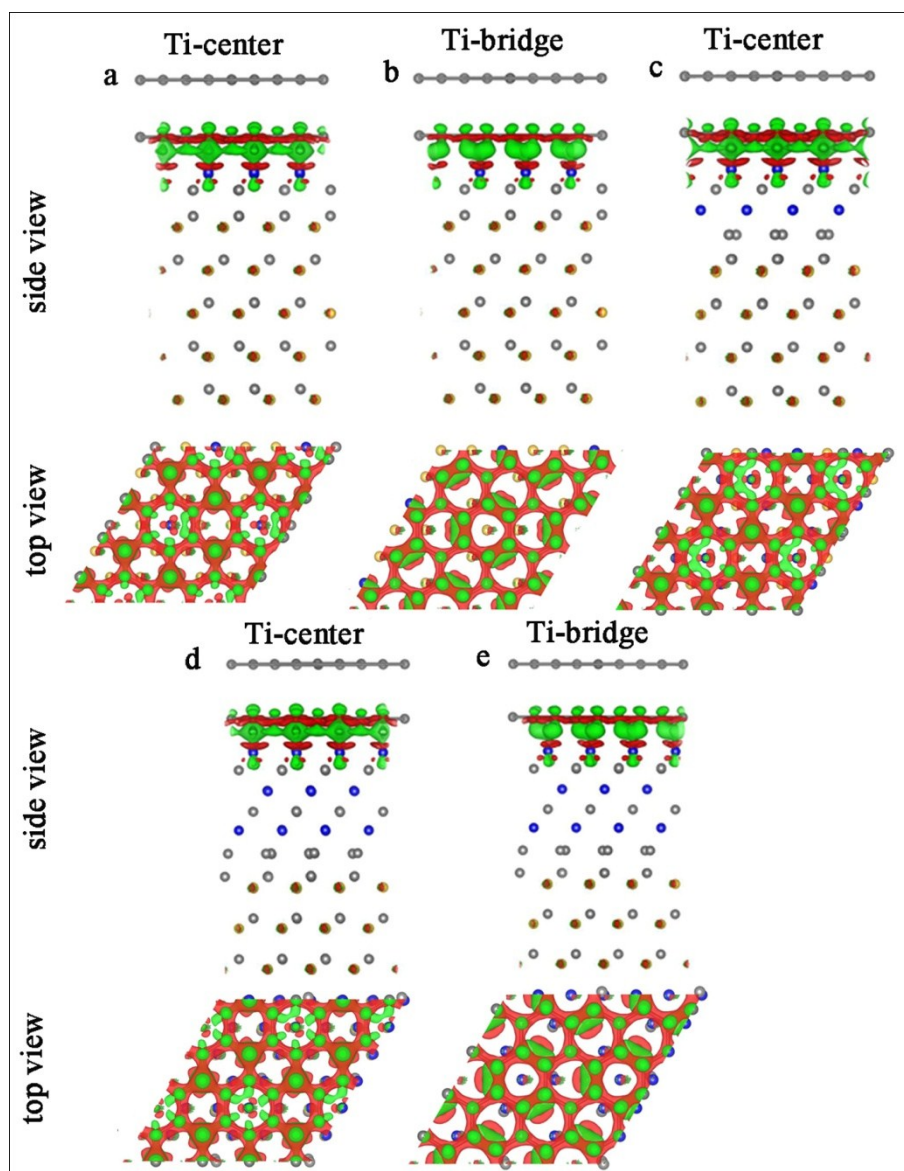

**Fig. S6** Charge density difference plots of bilayer graphene on (a, b) 1L-TiC/SiC, (c) 2L-TiC/SiC, and (d, e) 3L-TiC/SiC substrates. The red and green color regions mark the depletion and accumulation of electronic charges, respectively. The top views show the charge density difference at interface of the graphene/TiC(111)/SiC(000 $\bar{1}$ ) systems.

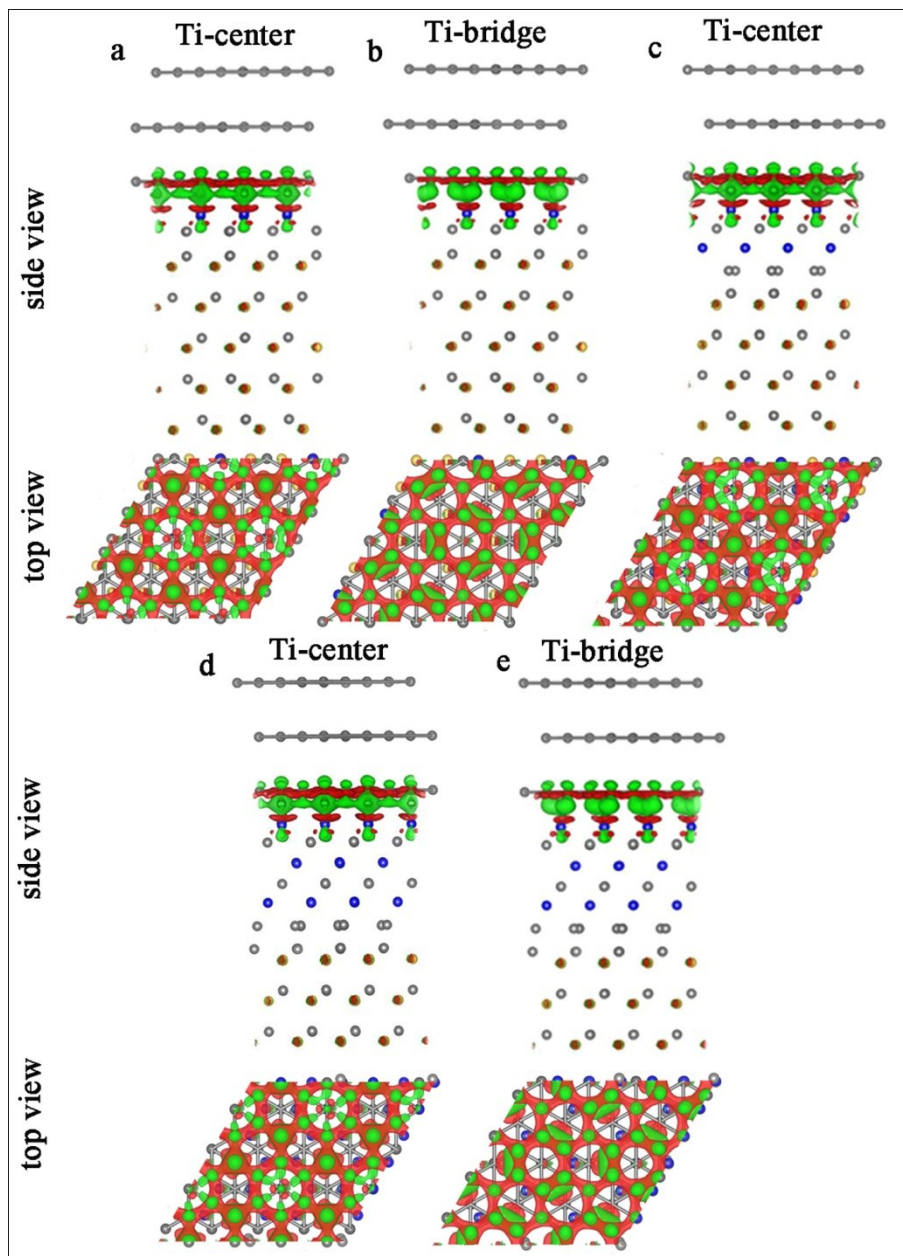

**Fig. S7** Charge density difference plots of trlayer graphene on (a, b) 1L-TiC/SiC, (c) 2L-TiC/SiC, and (d, e) 3L-TiC/SiC substrates. The red and green color regions mark the depletion and accumulation of electronic charges, respectively. The top views show the charge density difference at interface of the graphene/TiC(111)/SiC(000 $\bar{1}$ ) systems.

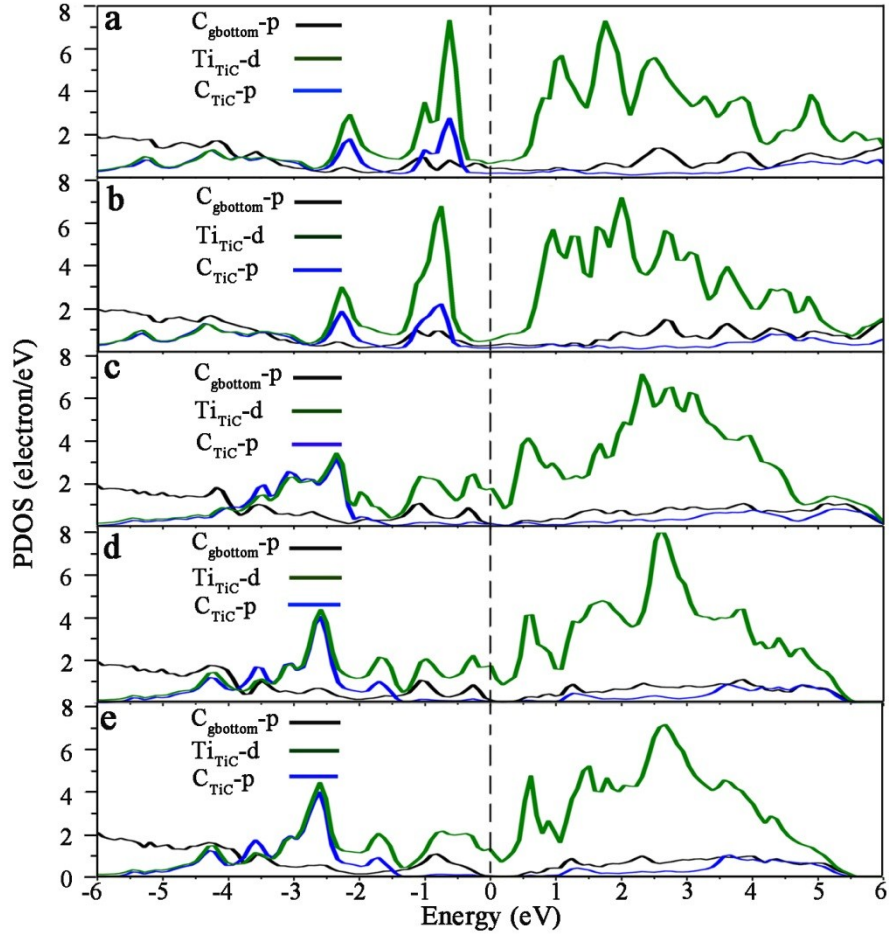

**Fig. S8** The PDOS of bilayer graphene on (a, b) 1L-TiC/SiC with the Ti-center and Ti-bridge site stacking, (c) 2L-TiC/SiC, and (d, e) 3L-TiC/SiC with the Ti-center and Ti-bridge site stacking. The dash lines indicate the Fermi level, which is taken as zero.
